# Supplementary material for: WebScipio: reconstructing alternative splice variants of eukaryotic proteins
Source: Oxford University Press journal article supplement (doi:10.1093/nar/gkt398), 2013-05-15
Supplement: gkt398_Supplementary_Data.zip [file gkt398_Supplementary_Data.zip]

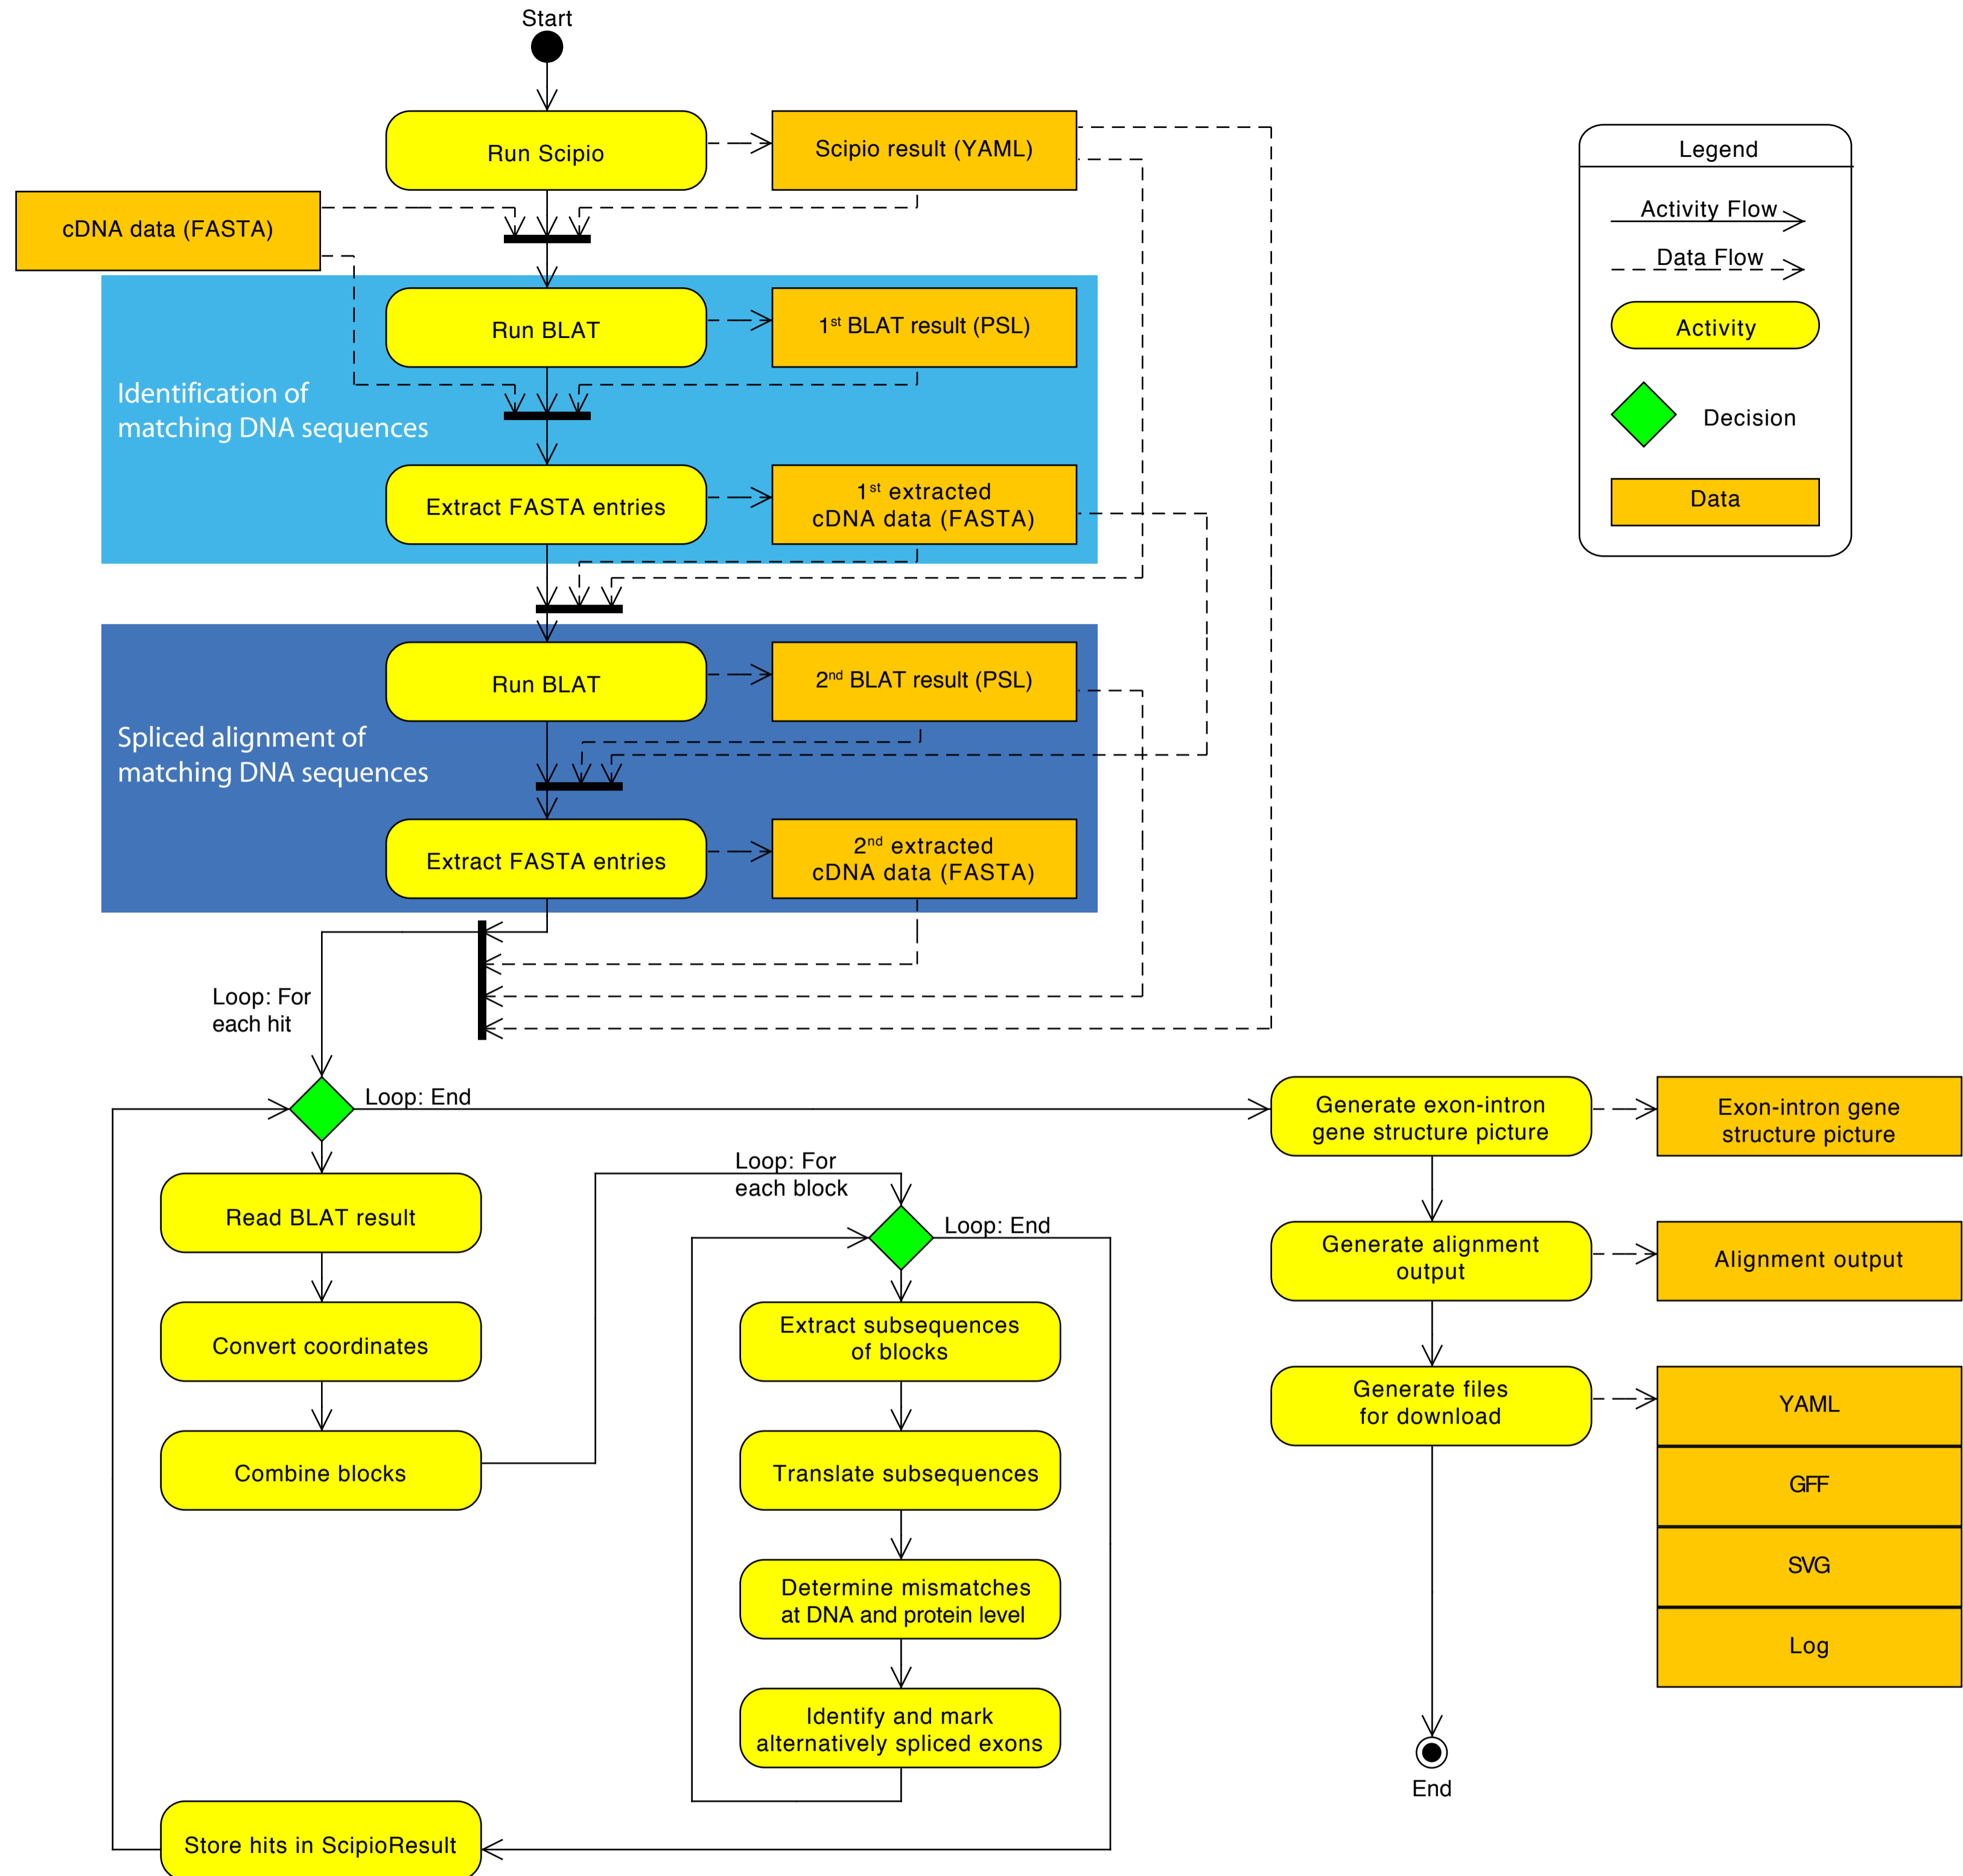

**Supplementary Figure 1.** The activity diagram describes the activity and data flow of WebScipio's algorithm to predict alternative splice forms. In the first step (light blue) BLAT is used to identify EST/cDNA sequences, which match the coding DNA sequence (CDS) of the Scipio result. In the second step (dark blue) a spliced alignment of the extracted EST/cDNA sequences to the genomic DNA of the Scipio result is executed. In the third step (bottom) each matching EST/cDNA sequence (hit) is processed and alternative splice forms are identified. As a last step the different output formats for WebScipio are generated.
